# Supplementary material for: Genetic loci associated with skin pigmentation in African Americans and their effects on vitamin D deficiency
Source: PubMed Central journal article supplement (PMC7891745; doi:10.1371/journal.pgen.1009319), 2021-02-18
Supplement: pgen.1009319.s001.pdf [file pgen.1009319.s001.pdf]

**S1 Table** 10 SNPs used for calculation of Genetic Score in GWAS and replication combined dataset (n=1,066). SNPs were selected from Table 3. SNP with the lowest *P*-value from each genomic region was included.

| CHR | SNP        | BP       | MA | MAF (%) |      | $\beta$ | $R^2$ | <i>P</i>                 |
|-----|------------|----------|----|---------|------|---------|-------|--------------------------|
|     |            |          |    | EUR     | AFR  |         |       |                          |
| 15  | rs2470102  | 48433494 | A  | 0.99    | 0.01 | -0.042  | 0.096 | 9.86 x 10 <sup>-30</sup> |
| 5   | rs16891982 | 33951693 | G  | 0.94    | 0.04 | -0.029  | 0.045 | 1.93 x 10 <sup>-13</sup> |
| 15  | rs1800404  | 28235773 | T  | 0.79    | 0.07 | -0.020  | 0.030 | 4.94 x 10 <sup>-8</sup>  |
| 11  | rs1042602  | 88911696 | A  | 0.37    | 0.01 | -0.020  | 0.019 | 0.0003                   |
| 4   | rs12644472 | 42809090 | T  | 0.13    | 0.12 | -0.016  | 0.017 | 0.0004                   |
| 11  | rs35264875 | 68846399 | T  | 0.20    | 0.02 | -0.025  | 0.015 | 0.005                    |
| 6   | rs12203592 | 396321   | T  | 0.12    | 0.01 | -0.018  | 0.014 | 0.02                     |
| 9   | rs2733832  | 12704725 | T  | 0.57    | 0.04 | -0.011  | 0.014 | 0.01                     |
| 20  | rs6058017  | 32856998 | A  | 0.90    | 0.21 | -0.008  | 0.013 | 0.01                     |
| 16  | rs1805007  | 89986117 | T  | 0.07    | 0.01 | -0.027  | 0.013 | 0.03                     |

CHR (Chromosome), BP (Basepair Position), MA (minor allele), MAF (minor allele frequency)
