# Supplementary material for: Genetic loci associated with skin pigmentation in African Americans and their effects on vitamin D deficiency
Source: PubMed Central journal article supplement (PMC7891745; doi:10.1371/journal.pgen.1009319), 2021-02-18
Supplement: pgen.1009319.s002.pdf [file pgen.1009319.s002.pdf]

**S2 Table** Top 3 SNPs associated with M-Index used for calculation of sex-specific Genetic Scores in GWAS and replication combined dataset (n=1,066).

| CHR             | SNP        | BP       | MA | MAF  | $\beta$ | $R^2$ | $P$                    |
|-----------------|------------|----------|----|------|---------|-------|------------------------|
| Males (n=932)   |            |          |    |      |         |       |                        |
| 15              | rs2470102  | 48433494 | A  | 0.20 | -0.0438 | 0.089 | $2.06 \times 10^{-26}$ |
| 5               | rs16891982 | 33951693 | G  | 0.17 | -0.0302 | 0.035 | $7.72 \times 10^{-12}$ |
| 15              | rs1800404  | 28235773 | T  | 0.21 | -0.018  | 0.017 | $6.83 \times 10^{-6}$  |
| Females (n=132) |            |          |    |      |         |       |                        |
| 15              | rs2470102  | 48433494 | A  | 0.33 | -0.0306 | 0.070 | 0.0001                 |
| 15              | rs1800404  | 28235773 | T  | 0.27 | -0.0239 | 0.041 | 0.003                  |
| 5               | rs16891982 | 33951693 | G  | 0.27 | -0.0201 | 0.027 | 0.02                   |
