# Supplementary material for: Genetic loci associated with skin pigmentation in African Americans and their effects on vitamin D deficiency
Source: PubMed Central journal article supplement (PMC7891745; doi:10.1371/journal.pgen.1009319), 2021-02-18
Supplement: pgen.1009319.s003.pdf [file pgen.1009319.s003.pdf]

**S3 Table** Associations between sex-specific Genetic Scores and M-Index.

|                            | Males |         |        | Females |         |        |
|----------------------------|-------|---------|--------|---------|---------|--------|
|                            | $R^2$ | $\beta$ | $P$    | $R^2$   | $\beta$ | $P$    |
| Whole Model                | 0.367 |         |        | 0.448   |         |        |
| Age                        | 0.008 | -0.001  | <0.001 | 0.074   | -0.001  | 0.01   |
| WAA                        | 0.233 | 0.175   | <0.001 | 0.292   | 0.216   | <0.001 |
| Genetic Score <sup>1</sup> | 0.126 | 0.892   | <0.001 | 0.082   | 0.607   | <0.001 |

Weighted sex-specific Genetic Score was calculated using top three SNPs, rs2470102 (*SLC24A5*), rs16891982 (*SLC45A2*), and rs1800404 (*OCA2*) associated with M-Index.
