# Supplementary material for: Genetic loci associated with skin pigmentation in African Americans and their effects on vitamin D deficiency
Source: PubMed Central journal article supplement (PMC7891745; doi:10.1371/journal.pgen.1009319), 2021-02-18
Supplement: pgen.1009319.s004.pdf [file pgen.1009319.s004.pdf]

**S4 Table** Associations between Genetic Scores (from 3 pigmentation gene SNPs and 3 vitamin D pathway gene SNPs) and serum vitamin D levels.

|                                                                         | $R^2$ | $\beta$ | $P$    |
|-------------------------------------------------------------------------|-------|---------|--------|
| Base Model <sup>1</sup>                                                 | 0.179 |         |        |
| + M-Index <sup>2</sup>                                                  | 0.001 | -0.038  | 0.34   |
| + Genetic Score (Pigmentation SNPs) <sup>2</sup>                        | 0.007 | -0.099  | 0.01   |
| + Genetic Score (Vitamin D Pathway SNPs) <sup>2</sup>                   | 0.019 | 0.139   | <0.001 |
| + Genetic Score (Pigmentation) + Genetic Score (Vitamin D) <sup>3</sup> | 0.029 |         |        |
| Genetic Score (Pigmentation SNPs)                                       |       | -0.116  | 0.007  |
| Genetic Score (Vitamin D SNPs)                                          |       | 0.136   | <0.001 |

<sup>1</sup> Base model includes age, WAA, UV season (Season of blood draw), study site, and total vitamin D intake.

<sup>2</sup> Subsequently, M-Index, Genetic Score estimated from 3 pigmentation gene SNPs, or Genetic Score from 3 vitamin D pathway gene SNPs were added to estimate the variance explained by M-Index or Genetic Scores. Genetic Score of vitamin D metabolic pathway genes were calculated using rs1155563 (*GC*), rs12801438 (*DHCR7/NADSYN1*), and rs11574143 (*VDR*). Genetic Score of pigmentation genes was calculated using rs2470102 (*SLC24A5*), rs16891982 (*SLC45A2*), and rs1800404 (*OCA2*).

<sup>3</sup> Both Genetic Scores (from pigmentation gene SNPs and vitamin D pathway gene SNPs) were added to the base model to estimate the variance explained by both Genetic Scores together.
