# Supplementary material for: Genetic loci associated with skin pigmentation in African Americans and their effects on vitamin D deficiency
Source: PubMed Central journal article supplement (PMC7891745; doi:10.1371/journal.pgen.1009319), 2021-02-18
Supplement: pgen.1009319.s005.pdf [file pgen.1009319.s005.pdf]

**S5 Table** Association between 10 skin pigmentation SNPs and serum vitamin D levels

| CHR | SNP        | BP       | MA | $\beta$ | $R^2$ | $P$          |
|-----|------------|----------|----|---------|-------|--------------|
| 15  | rs2470102  | 48433494 | A  | -0.108  | 0.010 | <b>0.004</b> |
| 5   | rs16891982 | 33951693 | G  | 0.009   | 0.000 | 0.82         |
| 15  | rs1800404  | 28235773 | T  | -0.034  | 0.001 | 0.34         |
| 11  | rs1042602  | 88911696 | A  | 0.022   | 0.000 | 0.54         |
| 4   | rs12644472 | 42809090 | T  | 0.023   | 0.001 | 0.50         |
| 11  | rs35264875 | 68846399 | T  | 0.014   | 0.000 | 0.69         |
| 6   | rs12203592 | 396321   | T  | -0.009  | 0.000 | 0.80         |
| 9   | rs2733832  | 12704725 | T  | -0.059  | 0.005 | <b>0.04</b>  |
| 20  | rs6058017  | 32856998 | A  | -0.032  | 0.001 | 0.35         |
| 16  | rs1805007  | 89986117 | T  | -0.028  | 0.001 | 0.42         |

Adjusting for age, WAA, UV season (season of blood draw), study site, and total vitamin D intake
