# Supplementary material for: Genetic loci associated with skin pigmentation in African Americans and their effects on vitamin D deficiency
Source: PubMed Central journal article supplement (PMC7891745; doi:10.1371/journal.pgen.1009319), 2021-02-18
Supplement: pgen.1009319.s006.pdf [file pgen.1009319.s006.pdf]

**S6 Table** Variants in Vitamin D metabolic and signaling pathway genes associated with serum 25(OH)D levels (n=606).

| CHR | SNP         | BP        | Gene                 | MA | $\beta$ | <i>P</i>     |
|-----|-------------|-----------|----------------------|----|---------|--------------|
| 2   | rs116071925 | 219354945 | <i>CYP27A1</i>       | A  | -0.047  | 0.31         |
| 4   | rs115316390 | 72870023  | <i>GC</i>            | A  | 0.086   | 0.22         |
| 4   | rs17467825  | 72970552  |                      | G  | -0.031  | 0.12         |
| 4   | rs2282679   | 72973418  |                      | C  | -0.031  | 0.14         |
| 4   | rs3755967   | 72974433  |                      | A  | -0.021  | 0.31         |
| 4   | rs2298850   | 72979302  |                      | G  | -0.033  | 0.13         |
| 4   | rs7041      | 72983369  |                      | G  | 0.012   | 0.42         |
| 4   | rs1155563   | 73008523  |                      | C  | -0.052  | <b>0.02</b>  |
| 4   | rs3733359   | 73014809  |                      | T  | -0.005  | 0.70         |
| 4   | rs16847024  | 73015714  |                      | T  | -0.016  | 0.49         |
| 7   | rs2740574   | 99026747  | <i>CYP3A4</i>        | A  | 0.006   | 0.62         |
| 11  | rs1993116   | 14866810  | <i>CYP2R1</i>        | T  | 0.020   | 0.15         |
| 11  | rs12794714  | 14870151  |                      | A  | -0.024  | 0.14         |
| 11  | rs114050796 | 14871229  |                      | T  | 0.000   | 0.99         |
| 11  | rs10741657  | 14871454  |                      | A  | 0.021   | 0.13         |
| 11  | rs2060793   | 14871886  |                      | A  | 0.016   | 0.23         |
| 11  | rs7944926   | 70843273  | <i>DHCR7/NADSYN1</i> | G  | -0.008  | 0.57         |
| 11  | rs12785878  | 70845097  |                      | T  | -0.006  | 0.65         |
| 11  | rs4944957   | 70845683  |                      | A  | -0.020  | 0.08         |
| 11  | rs12800438  | 70848651  |                      | A  | 0.026   | <b>0.04</b>  |
| 11  | rs3794060   | 70865327  |                      | T  | -0.001  | 0.94         |
| 11  | rs3829251   | 70872207  |                      | A  | -0.007  | 0.63         |
| 11  | rs4945008   | 70898896  |                      | G  | 0.000   | 0.99         |
| 11  | rs11234027  | 70911755  |                      | A  | 0.003   | 0.82         |
| 12  | rs11574143  | 46521184  | <i>VDR</i>           | A  | -0.043  | <b>0.049</b> |
| 12  | rs731236    | 46525024  |                      | C  | -0.007  | 0.64         |
| 12  | rs1544410   | 46526102  |                      | A  | -0.013  | 0.35         |
| 12  | rs2228570   | 46559162  |                      | T  | -0.007  | 0.63         |
| 12  | rs11574038  | 46563420  |                      | A  | -0.018  | 0.60         |
| 12  | rs11568820  | 46588812  |                      | G  | -0.025  | 0.10         |
| 12  | rs4646537   | 56443548  | <i>CYP27B1</i>       | C  | 0.036   | 0.09         |
| 12  | rs10877012  | 56448352  |                      | T  | -0.011  | 0.55         |
| 20  | rs6013897   | 52175886  | <i>CYP24A1</i>       | A  | -0.008  | 0.58         |
| 20  | rs6022990   | 52208939  |                      | G  | -0.016  | 0.44         |
| 20  | rs73913755  | 52223601  |                      | A  | -0.015  | 0.36         |
| 20  | rs73913757  | 52223925  |                      | T  | -0.022  | 0.18         |
| 20  | rs2248359   | 52224925  |                      | C  | -0.001  | 0.90         |
| 20  | rs2248461   | 52225609  |                      | G  | 0.003   | 0.82         |

Adjusted for age, WAA, UV season (season of blood draw), total vitamin D intake, and study site
