# Supplementary material for: Genetic loci associated with skin pigmentation in African Americans and their effects on vitamin D deficiency
Source: PubMed Central journal article supplement (PMC7891745; doi:10.1371/journal.pgen.1009319), 2021-02-18

**S1 Fig** QQ plot indicating there was no evidence of genomic inflation (Inflation factor  $\lambda=1.028$ ) using first three PCs.

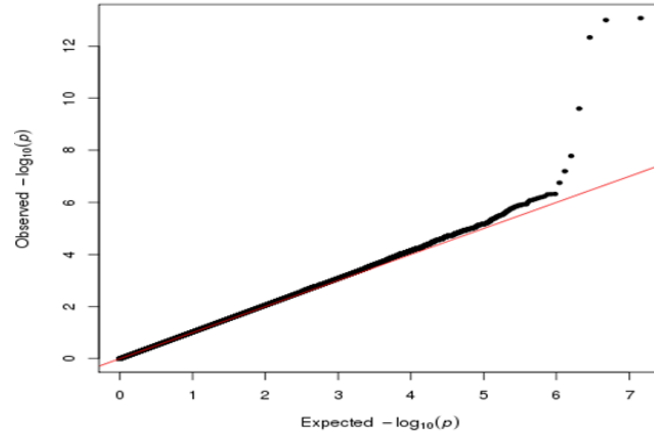

Supplement: pgen.1009319.s007.pdf [file pgen.1009319.s007.pdf]
