# Supplementary material for: Genetic loci associated with skin pigmentation in African Americans and their effects on vitamin D deficiency
Source: PubMed Central journal article supplement (PMC7891745; doi:10.1371/journal.pgen.1009319), 2021-02-18

**S2 Fig** Association between *TRHDE* SNPs on chromosome 12 and M-Index. LocusZoom plot of *TRHDE* region (A) and Box plot for *TRHDE* SNP rs11179301 (B). Mean M-Index for the rs11179301 genotype CC was 53.2 ( $\pm$ SD 10.2%) (Figure 1D). Only one individual had genotype TT, and mean M-Index for genotypes CT and TT combined was 48.5 ( $\pm$ SD 7.5%).

A.

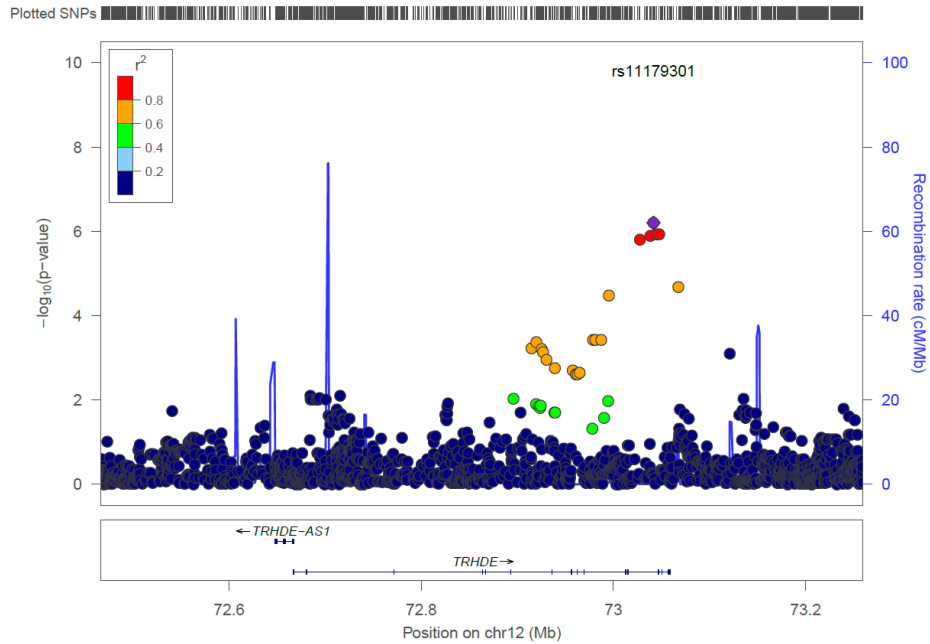

B.

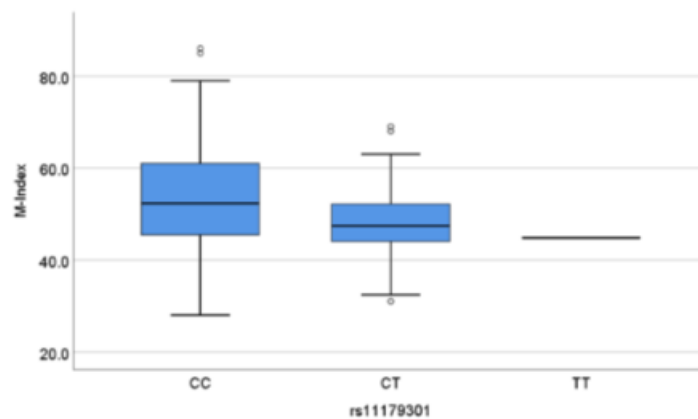

Supplement: pgen.1009319.s008.pdf [file pgen.1009319.s008.pdf]
