# Supplementary material for: Genetic loci associated with skin pigmentation in African Americans and their effects on vitamin D deficiency
Source: PubMed Central journal article supplement (PMC7891745; doi:10.1371/journal.pgen.1009319), 2021-02-18
Supplement: pgen.1009319.s009.pdf [file pgen.1009319.s009.pdf]

**S3 Fig** LocusZoom Plots of 4 Genomic Regions Previously Identified in GWAS of African Populations

*SNX13*

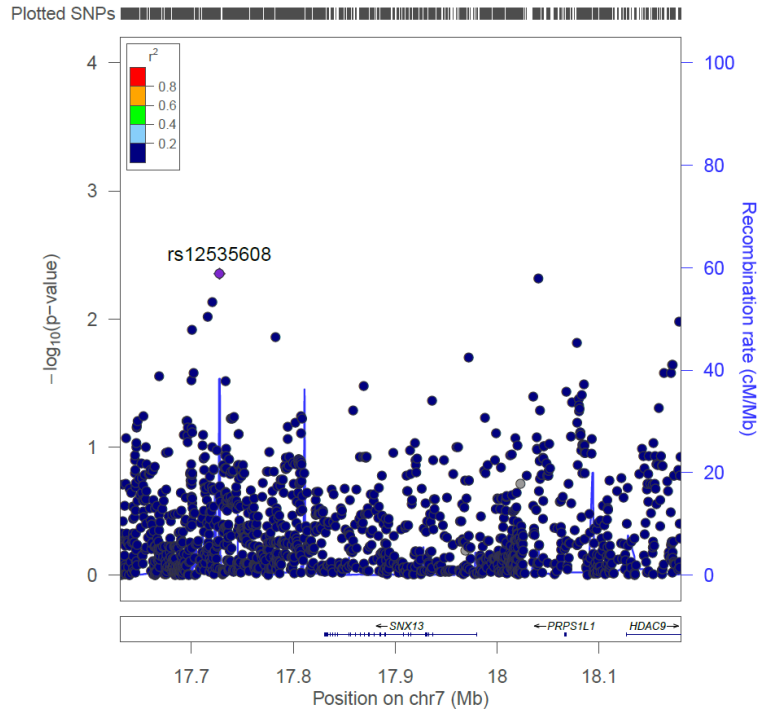

rs12535608 ( $P=4.4 \times 10^{-3}$ )

*SMARCA2/VLDLR*

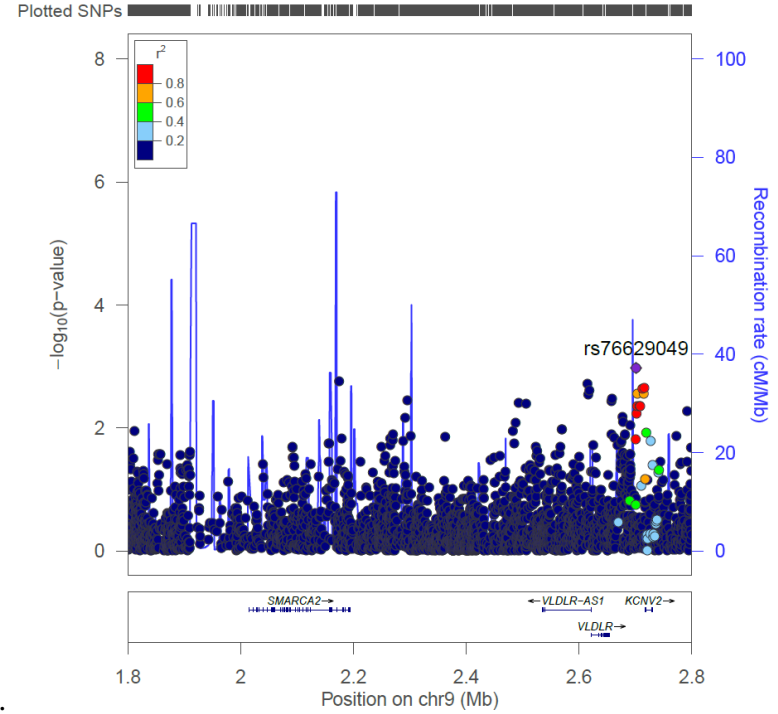

rs144734935 ( $P=1.7 \times 10^{-3}$ )

*TMEM138/DBB1*

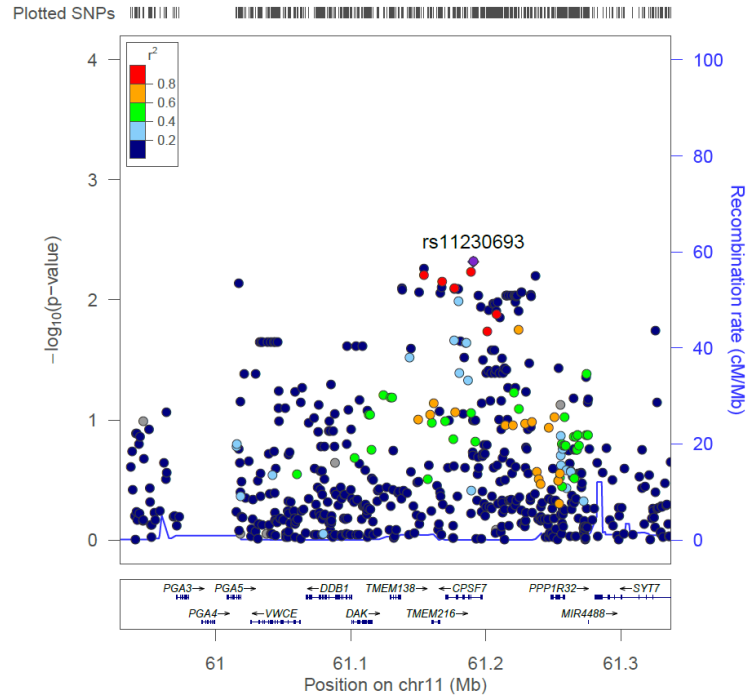

rs11230693 ( $P=4.8 \times 10^{-3}$ )

*MFSD12*

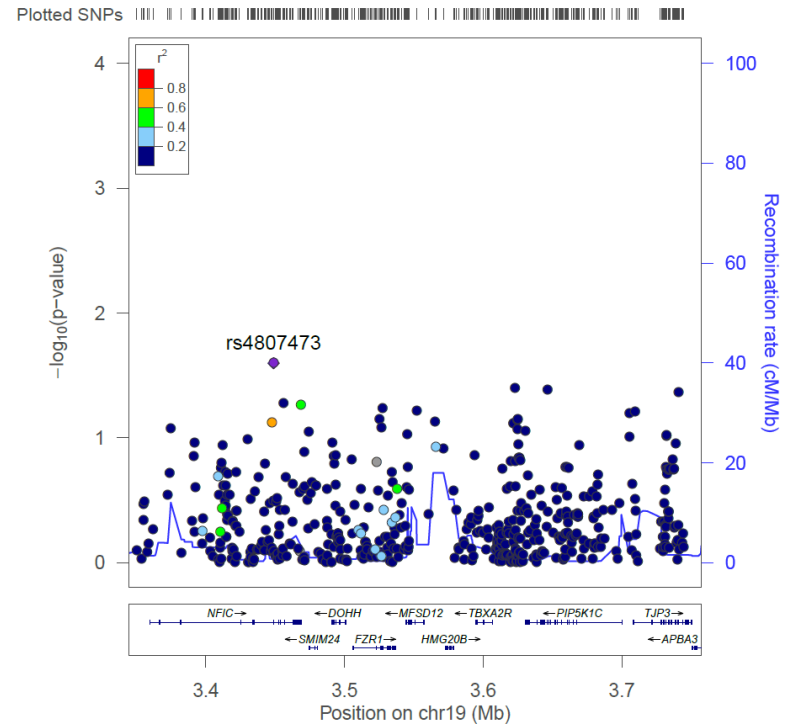

rs4807473 ( $P=0.03$ )
