# Supplementary material for: Genetic loci associated with skin pigmentation in African Americans and their effects on vitamin D deficiency
Source: PubMed Central journal article supplement (PMC7891745; doi:10.1371/journal.pgen.1009319), 2021-02-18

**S4 Fig** Heterogeneous associations between *THRDE* variants and M-Index in replication and GWAS dataset. Nine SNPs with minor allele frequency greater than 1% in the replication cohort were included for analysis. Three SNPs were associated with M-Index with  $P < 0.05$  in the replication dataset.

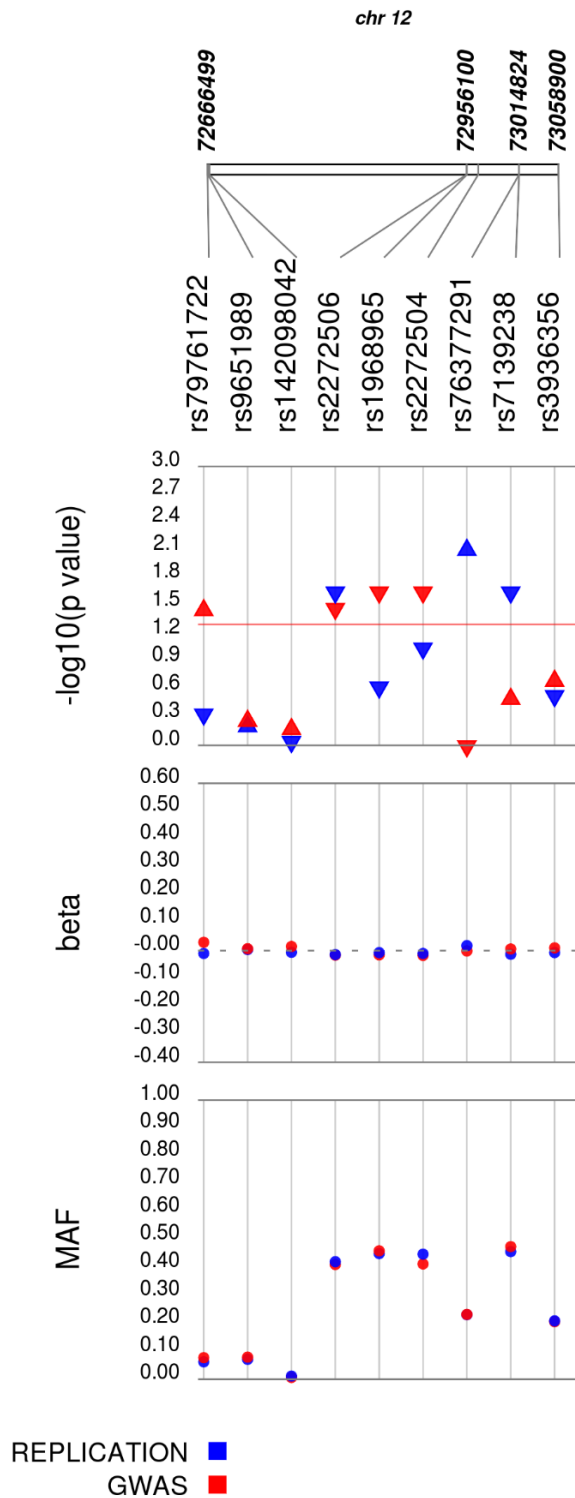

Supplement: pgen.1009319.s010.pdf [file pgen.1009319.s010.pdf]
