# Supplementary material for: Genetic loci associated with skin pigmentation in African Americans and their effects on vitamin D deficiency
Source: PubMed Central journal article supplement (PMC7891745; doi:10.1371/journal.pgen.1009319), 2021-02-18

**S5 Fig** Correlation between M-Index and Genetic Score (A), between M-Index and West African Ancestry (WAA) (B), and between Genetic Score and WAA (C). Correlations were significant with Spearman's correlation  $P < 0.001$ .

A.

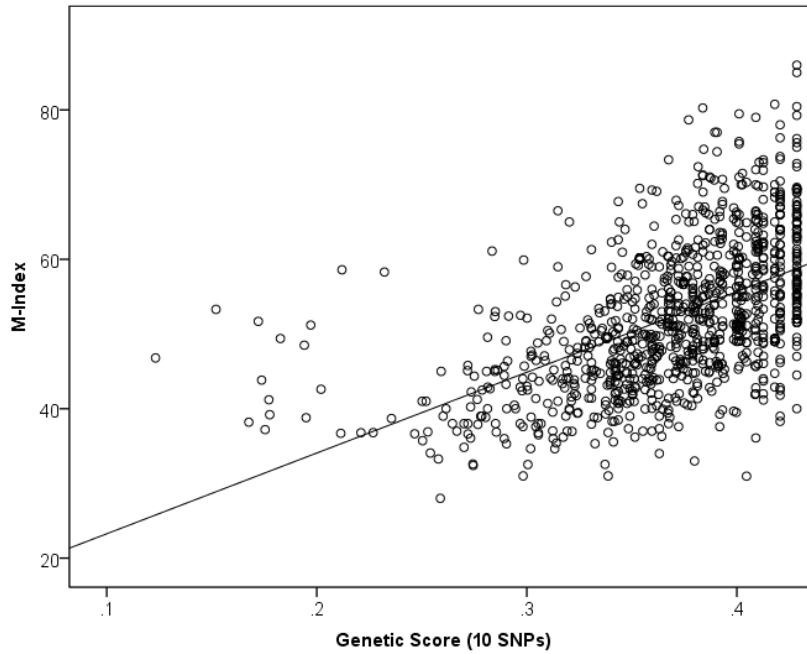

B.

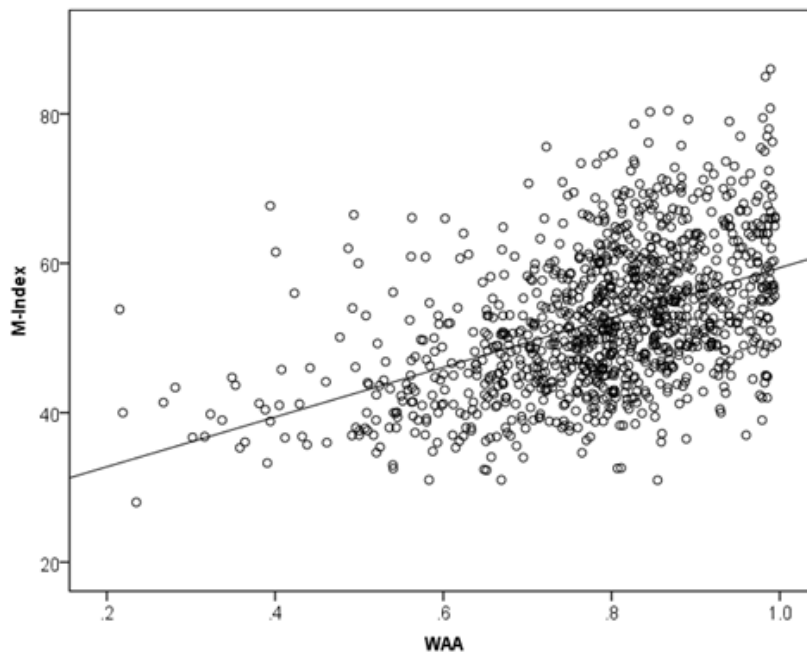

C.

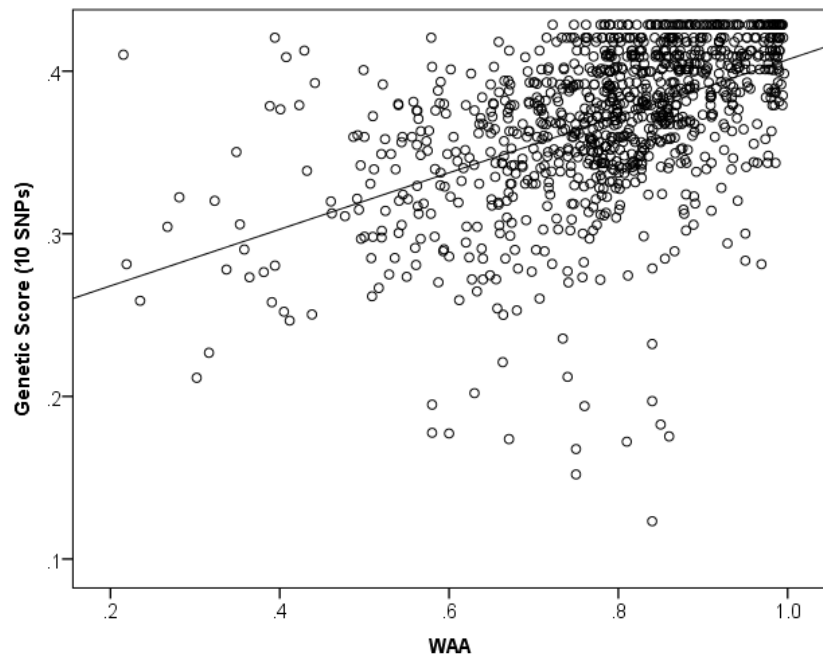

Supplement: pgen.1009319.s011.pdf [file pgen.1009319.s011.pdf]
